# Supplementary material
Source: PubMed Central journal article supplement (PMC6467691)
Supplement: NIHMS1516599-supplement-2.pdf [file NIHMS1516599-supplement-2.pdf]

**Supplementary Table 1.** List of vectors and vector components.

**Origins of replication (oriR):**

| Origin               | Copy #  | Host range               | Code     |
|----------------------|---------|--------------------------|----------|
| R6K <sup>1</sup>     | 10-20   | Narrow (Proteobacteria)  | <b>K</b> |
| p15A <sup>2</sup>    | 14-16   | Narrow (Enterobacteria)  | <b>A</b> |
| oriV <sup>3</sup>    | 4-7     | Broad (Gram- and Gram+)  | <b>V</b> |
| pBBR1 <sup>4</sup>   | 15-40   | Broad (preferably Gram-) | <b>B</b> |
| RSF1010 <sup>5</sup> | 12      | Broad (Gram- and Gram+)  | <b>S</b> |
| RCR <sup>6</sup>     | 250-350 | Broad (Eubacteria)       | <b>W</b> |

**Integrative elements:**

| Transposase        | Transposon inverted repeat sequence | Host range | Code     |
|--------------------|-------------------------------------|------------|----------|
| none               | -                                   | -          | -        |
| Himar <sup>7</sup> | ACAGTTGGATGATAAGTCCCCGGTCT          | Broad      | <b>h</b> |
| Tn5                | CTGTCTTTATACACATCT                  | Broad      | <b>t</b> |

**Regulation sequences:**

| Promoter/UTR                                                                                                                                                                              | Expression in E. coli | Origin of sequence               | Code     |
|-------------------------------------------------------------------------------------------------------------------------------------------------------------------------------------------|-----------------------|----------------------------------|----------|
| GATTGCATTAGGTTTTAGTTTCTTGTATAA<br>TGCTTAATGTGGTCACTGACAGGCTACGA<br>TACGGAAGGTTGCTCACGCCCGCCCTTT<br>GCCATGGCTAGTGTGTGAAATTTCCGAGG<br>AGCAAGTCTATTTCCAAAAATGGCGAAAA<br>AGGAGGTAATACA        | +++                   | <i>Bacillus cellulosilyticus</i> | <b>1</b> |
| GGGAGAGCTTCAACGGCGCTTCTACCCATT<br>TGCTTGAAAGGATGAGGAGCAGGAAGAAA<br>TTCCGTCCCCAATGCGACGGCCCTTACAT<br>CCATGTGTTTGATAGTATAATGGATACGG<br>ATTGACCAATTGTTTCAATTTAGTCAGTTT<br>AAGGATGAGGAGT      | ++                    | <i>Geobacillus sp.</i>           | <b>2</b> |
| GTGAAGGATACGGCTGCGGCACTTCGACAT<br>CGCCCCATGTGGCGGCTTTGAACTGGGCTT<br>ATGAAACGCGTTTCAACAACCTTTTTTGACCA<br>TCGGCGCAACGTGGTATCATGCGTTCAGC<br>TTTTGCCCATACATACTACGTGCTCAATCT<br>AGGAGGATTCATAC | +++                   | <i>Eggerthella lenta</i>         | <b>3</b> |

|                                                                                                                                              |     |                                       |   |
|----------------------------------------------------------------------------------------------------------------------------------------------|-----|---------------------------------------|---|
| CTCTAGAGTAGTAGATTATTTTAGGAATTT<br>AGATGTTTTGTATGAAATAGATGCTTCGTA<br>TGGAAATTAATGAAATTTTAGTCAGGTAAA<br>AAAGGTAATAGGAGAAATATT                  | +++ | <i>Segmented filamentous bacteria</i> | 4 |
| GTTTTAAATGATGAAAAGAAATATTTAGGG<br>AAGATTGTTTCGACGCGAATTGTTGATCTG<br>GAAAATGATCACCTTATCGGACAAGCTTTA<br>AAATAGGAGGATATAAAAAT                   | ++  | <i>Segmented filamentous bacteria</i> | 5 |
| ATAAGGATTCTTTAAAGAGAGATATAGTTA<br>TGTCAAAGACTGTAGAATTTTAGTAAATC<br>AAAAAATAAGAGGATTAATAGAGTG<br>TATTTTAAAGGAGGAGACTT                         | +++ | <i>Segmented filamentous bacteria</i> | 6 |
| AAACACCAATAAAATAGAAATATTTAGGAG<br>CGACTTTAAAAAGTTTAATAAGAATTGTT<br>TATGAGATATTTTATTATATTTAAACTCA<br>ATTTAAAGTAGGGAGAATAG                     | +   | <i>Segmented filamentous bacteria</i> | 7 |
| GCAAGTGTCAAGAAGTTATTAAGTCGGGA<br>GTGCAGTCGAAGTGGCAAGTTGAAAAATT<br>CACAAAAATGTGGTATAATATCTTTGTTCA<br>TTAGAGCGATAAACTTGAATTTGAGAGGGA<br>ACTTAG | +   | <i>Clostridium perfringens</i>        | 8 |

#### Vector selection genes:

| Resistance gene | Antibiotic selection | [Ab] in <i>E. coli</i> |
|-----------------|----------------------|------------------------|
| Beta-lactamase  | Carbenicillin        | 50 µg/ml               |
| Chlor           | Chloramphenicol      | 20 µg/ml               |
| Tet             | Tet                  | 25 µg/ml               |
| Spec            | Spec                 | 200 µg/ml              |
| Kan             | Kan                  | 50 µg/ml               |

#### Cargo selection cassettes:

| Resistance cassette | Antibiotic selection | [Ab] in <i>E. coli</i> |
|---------------------|----------------------|------------------------|
| GFP-Beta-lactamase  | Carb                 | 50 µg/ml               |
| GFP-CatP            | Chlor                | 20 µg/ml               |
| GFP-Tet             | Tet                  | 25 µg/ml               |
| GFP-Spec            | Spec                 | 250 µg/ml              |
| GFP-Kan             | Kan                  | 50 µg/ml               |

|          |     |   |
|----------|-----|---|
| GFP-ErmG | Erm | - |
|----------|-----|---|

| Vector name | Cargo selection    | Cargo promoter | Vector selection | Transposase promoter |
|-------------|--------------------|----------------|------------------|----------------------|
| pGT-Ah1     | GFP-Beta-lactamase | 4              | Chlor            | 4                    |
| pGT-Ah2     | GFP-Beta-lactamase | 5              | Chlor            | 5                    |
| pGT-Ah3     | GFP-Beta-lactamase | 6              | Chlor            | 6                    |
| pGT-Ah4     | GFP-Beta-lactamase | 7              | Chlor            | 7                    |
| pGT-Ah5     | GFP-CatP           | 8              | Kan              | 4                    |
| pGT-Ah6     | GFP-CatP           | 8              | Kan              | 5                    |
| pGT-Ah7     | GFP-CatP           | 8              | Kan              | 6                    |
| pGT-Ah8     | GFP-CatP           | 8              | Kan              | 7                    |
| pGT-Ah9     | GFP-Tet            | 4              | Chlor            | 4                    |
| pGT-Ah10    | GFP-Tet            | 4              | Chlor            | 5                    |
| pGT-Ah11    | GFP-Tet            | 4              | Chlor            | 6                    |
| pGT-B1      | GFP                | 1              | Beta-lactamase   | -                    |
| pGT-B2      | GFP                | 2              | Beta-lactamase   | -                    |
| pGT-B3      | GFP                | 3              | Beta-lactamase   | -                    |
| pGT-S1      | GFP-Beta-lactamase | 4              | Beta-lactamase   | -                    |
| pGT-S2      | GFP-Beta-lactamase | 5              | Beta-lactamase   | -                    |
| pGT-S3      | GFP-Tet            | 4              | Tet              | -                    |
| pGT-S4      | GFP-Tet            | 5              | Tet              | -                    |
| pGT-Kh1     | GFP-Beta-lactamase | 4              | Chlor            | 4                    |
| pGT-Kh2     | GFP-Beta-lactamase | 5              | Chlor            | 5                    |
| pGT-Kh3     | GFP-Beta-lactamase | 7              | Chlor            | 7                    |

#### References

1. Stalker, D. M., Kolter, R. & Helinski, D. R. Proc. Natl. Acad. Sci. U.S.A. 76, 1150–1154 (1979).
2. Hiszczyńska-Sawicka, E. & Kur, J. Plasmid 38, 174–179 (1997).
3. Kües, U. & Stahl, U. Microbiol. Rev. 53, 491–516 (1989).
4. Antoine, R. & Locht, C. Mol. Microbiol. 6, 1785–1799 (1992).
5. Frey, J., Bagdasarian, M. M. & Bagdasarian, M. Gene 113, 101–106 (1992).
6. Bryksin, A. V. & Matsumura, I. PLoS One 5, e13244 (2010).
7. Lampe, D. J., Akerley, B. J., Rubin, E. J., Mekalanos, J. J. & Robertson, H. M. Proc. Natl. Acad. Sci. U.S.A. 96, 11428–11433 (1999).

**Supplementary Table 2.** Vector libraries used in this study.

| <b>Library</b> | <b>Vectors</b>                                            |
|----------------|-----------------------------------------------------------|
| pGT-L1         | B1, B2, B3                                                |
| pGT-L2         | Ah5, Ah6, Ah7, Ah8                                        |
| pGT-L3         | S1, S2, S3, S4                                            |
| pGT-L4         | Ah1, Ah3, B1, B2, B3                                      |
| pGT-L5         | Ah5, Ah6, Ah7, Ah8, Ah9, Ah10, Ah11                       |
| pGT-L6         | Ah1, Ah3, Ah5, Ah6, Ah7, Ah8, Ah9, Ah10, Ah11, B1, B2, B3 |
| pGT-L7         | Ah1, Ah2, Ah3, Ah4                                        |
| pGT-L8         | Kh1, Kh2, Kh3                                             |



|                                |                                                                                                                                                                                                                                                                                                                                                                                                                                                                                                                                                                                                                                                                                                                                       |  |
|--------------------------------|---------------------------------------------------------------------------------------------------------------------------------------------------------------------------------------------------------------------------------------------------------------------------------------------------------------------------------------------------------------------------------------------------------------------------------------------------------------------------------------------------------------------------------------------------------------------------------------------------------------------------------------------------------------------------------------------------------------------------------------|--|
| ermG (erythromycin resistance) | ATGAACAAAGTAAATATAAAGATAGTCAAATTTTACTTCAAATATCACATAGAAAAAATGAATTGCATAAGTTAGATGAAAAAGATAACATCTTTGAAATAGTGCAGGGAAAGTCAATTTACTGCTGGATTGGTAAAGAGATGTAATTTGTAAACGGCGATAGAAATGATCTCAAATATGTGAGGTAACGTAATAAGCTCTTAAATATCCTACTCAAAATAGTAAATGATGATATACTGAAATTTACATTTCCCTAGCCCAACATCCATATAAAATATTTGGCAGCATACCTTACAACATAGCCAAATATAATTCGAAAAATTTGTTTTGAAAGTTCAGCCCAATAAGTTATTTAATAGTGAATATGGTTTTGCTAAAATGTTATTAGATACAACAGATCCTAGCATTGCTGTTAATGGCAGAGGTAGATATTCTATATTAGCAAAAATTCCTAGGTATTATTTCCATCCAAAACCTAAAGTGGATAGCACATTAATTTGATTAATAAAAGAAAGCCAGCAAAAATGGCATTTAAAGAGAAAAAATATGAAACTTTTGTAATGAAATGGGTAAACAAGATAGCAAAAACCTGTTACAAAAATCAATTTAATAAGCTTTAAAAACATCGCAGAAATATATGATATAAACAAATATTAGTTTCGAACAATTTGTATCGCTATTTAATAGTTATAAAATATTAAACGGCTAA |  |
| sfGFP                          | ATGCGTAAAGCGAAGAGCTGTTCACTGGTTTTGCTCACTATTCTGTTGGAAGTGGATGGTGTATGTCACAGGTCATAAGTTTTCCGTGCGTGGCAGGGTGAAGGTGACGCAACTAATGGTAAACTGACGCTGAAGTTTCACTGTACTACTGGTAAACTGCCGTAACCTGGCCGACTCTGGTAAACGACAGCTGACTTATGGTTCAGTGCCTTTGCTCGTTATCCGGACACATGAAGCAGCATGACTTCTCAAGTCCGCCATGCCGGAAGGCTATGTCAGGAACGCAGGATTTCTTTAAGGATGACGGCACGTAACAAAACCGCTGCCGAAAGTAAATTTGAAGCGCATACCTGGTAAACCGCATTTGAGCTGAAAGGCATTGACTTTAAAGAAGACGGCAATATCCTGGCCATAAGCTGGAATACAATTTAACAGCCAAATGTTACATCACCGCGATAAAACAAAATGGCATTAAAGCGAATTTAAAAATTCGCCACAACCTGGAGGATGGCAGCTGCAGCTGGCTGATCCTACCAGCAAAACACTCCAATCGGTGATGGTCTGTTCTGCTGCCAGACAATCACTATCTGAGCACGCAAAAGCTTCTGCTCAAAGATCCGAACGAGAAACGCGATCAGTGGTCTGCTGGAGTTTCGTAACCCGACGCGGCATCACCGCATGGTATGGATGAACGTGACAAATAA      |  |

| Vector selection genes             | Sequence                                                                                                                                                                                                                                                                                                                                                                                                                                                                                                                                                                                                                                                | Notes                                                                                                         |
|------------------------------------|---------------------------------------------------------------------------------------------------------------------------------------------------------------------------------------------------------------------------------------------------------------------------------------------------------------------------------------------------------------------------------------------------------------------------------------------------------------------------------------------------------------------------------------------------------------------------------------------------------------------------------------------------------|---------------------------------------------------------------------------------------------------------------|
| Chlor (chloramphenicol resistance) | ATGGAGAAAAAATCACTGGATATACCACCGTTGATATATCCCAATGGCATCGTAAAGAACATTTTGAAGCATTTCAGTCAGTTGCTCAATGTACCTATAACAGACCGTTCAGCTGGATATTACCGCCTTTTAAAGACCGTAAAGAAAAATAAGCACAGTTTATTCGCGCCTTTATTCACATTTCTGGCCGCTGATGAATGCTATCCGGAATACGATATGGCATGAAGACCGGTGAGCTGGTATGATGATGGATGTTTCCCTTTACACCGTTTCCATAGCAAACTGAAACGTTTTCATCGCTCGGAGTGAATACCACGACGATTTCCGGCAGTTTCTACACATATATTCGCAAGATGTCGGCTTACGGTGAAGAACCTGGCCTATTTCCCTAAAGGGTTTATGGAATATGTTTTTCGCTCAGCCAACTCCCTGGGTGAGTTCACCACTTTGATTTAAACGTGGCAATATGAGACAACCTTTCGCCCCGTTTTCCACATGGGCAATATTATACGCAAGGCGACAGGTGCTGATCCGCTGGCATTCAGGTTCCATCATGCGCTTTGTATGGCTTCCATGTCGGCAGATGCTTAATGAATTACACAGTACTGCGATGAGTGCAGGGCGGGCGTAA | All vector selection markers not listed here are the same as the ones in the "Cargo selection genes" section. |

| Origins of                 | Sequence                                                                                                                                                                                                                                                                                                                                                                                                                                                                                                                                                                                                                                                                                                                                                                                       | Notes                                        |
|----------------------------|------------------------------------------------------------------------------------------------------------------------------------------------------------------------------------------------------------------------------------------------------------------------------------------------------------------------------------------------------------------------------------------------------------------------------------------------------------------------------------------------------------------------------------------------------------------------------------------------------------------------------------------------------------------------------------------------------------------------------------------------------------------------------------------------|----------------------------------------------|
| R6K origin of replication  | ATCCCTGGCTTGTGTCACAAACCGTTAAACCTTAAAGCTTTAAAGCCTTATATATCTTTTTTTTCTTATAAAAATTAACCTTAGAGGCTATTTAAGTTGCTGATTTATATTAATTTTTATTGTCACAAATGAGAGCTTAGTACGTGAAACATGAGAGCTTAGTACCTTAGCCATGAGAGCTTAGTACCTTAGCCATGAGGTTTAGTTCGTTAAACATGAGAGCTTAGTACGTTAAACATGAGAGCTTAGTACCTGAAACATGAGAGCTTAGTACCTAGTACATCAACAGGTTGAAGTCTGATCTTC                                                                                                                                                                                                                                                                                                                                                                                                                                                                             | Requires additional pir gene for replication |
| p15A origin of replication | AACAATATATCGTATGGGCTGACTTCAGGTGCTACATTTGAAGAGATAAATGCACTGAAATCTAGAAATATTTTATCTGATTAATAAGATGATCTTCTGAGATCGTTTTGGTCTGCGGTAATCTCTGCTCTGAAAAACGAAACCGCCTTGCAGGGCGGTTTTTCGAAGGTTCTCTGAGCTACCAACTCTTTGAACCGAGGTAAGTGGCTGGAGGAGCGCAGTCAACAACTGCTCCTTTGCTTTAGCTTAAACCGCGCATGACTTCAAGACTAACCTCTAAATCAATACCAAGTGGCTGCTGCCAGTGGTCTTTGATGCTCTTCGGGTTGGACTCAAGACGATAGTTACCGGATAAGGCGCAGCGGTCGGACTGAACGGGGGTTCTGTCATACAGTCCAGCTTGGAGCGAAGTGCCTACCCGGAAGTGAAGTGCAGCGCTGCAATGAGACAAACCGGCCATAACAGCGAATGACACCGGTAACCGGTAACCGAAAGGCAGGAACAGGAGAGCCACGAGGAGCCCGAGGCGGAAACCGCTGCTATCTTTATAGTCCGTGCGGTTTCGCCCACTGATTTGAGCGTCAGATTTGCTGATGCTTGTGAGGGGGGGAGCCTTAGAAAAACCGCTTGCAGCGCCCTCTCACTTCCCTGTTAAGTATCTTCTGGCATCTCCAGGAAATCTCCGCCGCTTCTGTAAGCCATTTCCGCTGCGCGAGTGAACGACCGAGCTAGCGAGTCAAGTGGAGGAGGAAAGCGGAATATATCC |                                              |
| oriV                       | AGCGGGCCGGGAGGTTGAGAAAGGGGGGCCACCCCTTCCGGCTGCGCGGTCACGCGCCAGGGCGCAGCCCTGGTTAAAAACAAGGTTTATAAATATTGGTTTAAAGCAGGTTAAAGACAGGTTAGCGGTGCGCCGAAACCGCGGAAACCTTGCAAATGCTGGATTTCTGCTGTGGACAGCCCTCAAATGTCATAGGTGCGCCCTCATCTGTCATCACTCTGCCCTCAAGTGTCAAGGATCGCGCCCTCATCTGTCAGTAGTCGCGCCCTCAAGTGTCAATCCGCGAGGCACTATCCCAAGGCTGTCCACATCATCTGTGGAAACTCGGTAATAACAGGCTTTTCGCCGATTTGCGAGGCTGCGCAGCTCCAGCTGCGCGCCGAAATCGAGCCTGCCCTCATCTGTCACGCGCGCGGTTGAGTCCGGCCCTCAAGTGTCAACTCCGCCCTCATCTGTCAGTGAAGGCAAGTTTTCCGGTGGTATCCACAACCGCGCGCGGCTGCTCGCACAGGCTTCCAGGCGGTTCTGGCGGCTTTGCAAGGCCATAGACGCGCCGAGCCACGCGCGAGGCAACGAGCCGTTGAGCTCGAAAGCGCTGGAAGCCCTAGCCAGCGGAGAGGGGGGAGACAAGCCAGGGCGAGGCTCGACGACGACATAGCCGTTCTCGCAAGGAGCAATTTCCCTGCGGTGCCCTCAAGTGTCAATGAAAGTTTCCACGCGAGCCATTCGCGAGAGCTTGGATCCACGCTAGATCTATCTCA      | Requires trfA protein for replication        |

|                                    |                                                                                                                                                                                                                                                                                                                                                                                                                                                                                                                                                                                                                                                                                                                                                                                                                                                                                                                                                                                                                                                                                                                                                                                                                                                                                                                                                                                                                                                                                                                                                                                                                                                                                                                                                                                                                                                                                                                                                                                                                                                                                                                                                                                                                                                                                                                                                                                                                                                                                                                                                                                                                                                                                                                                                                                                                                                                                                                                                                                                                                                                                                                                                                                                                                                                                                                                                                                                                                                                                                                                                                                                                                                                                                                                                                                                                                                                                                                                                                                                                                                                                                                                                                                                                                                                                                                                                                                                                                                                                                                                                                                                                                                                                                                                                                                                                                                                                              |                                                                                          |
|------------------------------------|----------------------------------------------------------------------------------------------------------------------------------------------------------------------------------------------------------------------------------------------------------------------------------------------------------------------------------------------------------------------------------------------------------------------------------------------------------------------------------------------------------------------------------------------------------------------------------------------------------------------------------------------------------------------------------------------------------------------------------------------------------------------------------------------------------------------------------------------------------------------------------------------------------------------------------------------------------------------------------------------------------------------------------------------------------------------------------------------------------------------------------------------------------------------------------------------------------------------------------------------------------------------------------------------------------------------------------------------------------------------------------------------------------------------------------------------------------------------------------------------------------------------------------------------------------------------------------------------------------------------------------------------------------------------------------------------------------------------------------------------------------------------------------------------------------------------------------------------------------------------------------------------------------------------------------------------------------------------------------------------------------------------------------------------------------------------------------------------------------------------------------------------------------------------------------------------------------------------------------------------------------------------------------------------------------------------------------------------------------------------------------------------------------------------------------------------------------------------------------------------------------------------------------------------------------------------------------------------------------------------------------------------------------------------------------------------------------------------------------------------------------------------------------------------------------------------------------------------------------------------------------------------------------------------------------------------------------------------------------------------------------------------------------------------------------------------------------------------------------------------------------------------------------------------------------------------------------------------------------------------------------------------------------------------------------------------------------------------------------------------------------------------------------------------------------------------------------------------------------------------------------------------------------------------------------------------------------------------------------------------------------------------------------------------------------------------------------------------------------------------------------------------------------------------------------------------------------------------------------------------------------------------------------------------------------------------------------------------------------------------------------------------------------------------------------------------------------------------------------------------------------------------------------------------------------------------------------------------------------------------------------------------------------------------------------------------------------------------------------------------------------------------------------------------------------------------------------------------------------------------------------------------------------------------------------------------------------------------------------------------------------------------------------------------------------------------------------------------------------------------------------------------------------------------------------------------------------------------------------------------------------------------|------------------------------------------------------------------------------------------|
| <p>pBBR1 origin of replication</p> | <p>CTACGGGCTTGTCTCCGGGCTTCGCCTCGCGGTCGCTGCGCTCCCTTGCCAGCCGCTGGATATGTGGACGATGGCCGCGAGCGGCCACCAGGCTGGCTCGCTTCGCTCGGCC<br/> CGTGGACAACCTGTGACAAGCTGTAGGACAGCTGCGCTGCCACGAGCTTGACCAAGGATTTGCCACAGGATTTGCCACCAGCTACCCAGCCTTCGACCACATACCACCAGGCTCCAAC<br/> TGCCGGCTCGGGCTTCGCCCAATTTTAAATTTTCTCTGGGACCAAGAACTAGATATAGGGCGAATTCGAAAGACTTAAAAATCAACAATTTAAAAAGGGGGTACCG<br/> AAGGCTCGCGCAGCAGCCGCGCAGCGCTTGGCTTGACCGCTGGAACGACCAAGCCTATGCGAGTGGGGCAGTCGAAGCGAAGCCCGCCGCTGCCCCGAGCCTC<br/> ACGGCGGCGAGTGGGGGGTTCAGGGGGGAGCGCCACTTGGGCAAGCCGAAAGCCGCGAGTCGATCAACAAGCCCGGAGGGGGCCATTTTGGCCGAGGGGGAGCCCG<br/> GCCGAAGCGCTGGGGAAACCCGCGAGGGGTGCCCTTCTTGGGACCAAGAACTAGATATAGGGCGAATTCGAAAGACTTAAAAATCAACAATTTAAAAAGGGGGTACCG<br/> AACAGCTCATTTGGCGCACCCCGCAATAGCTCATTCGCTAGGTTAAAGAAAATCTGTAATTTGACTGCCACTTTACGCAACGCAATAATTTGTTGCGCGCTGCCAAAAGTTGC<br/> AGCTGATTCGCGATGGTCCGCAACCGTGGCGCACCTACCGCATGGAGATAAGCATGGCCAGCAGTCCAGAGAAATCGGCATTCAAGCCAAAGCAAGCCCGGCTCACTGGGT<br/> GCAACGGAAAGCAAGCGCATGAGCGTGGCGGGCTTATGCGAGAAACCCAGCGGCAATGCTGCTGATCACCTGCTGGCGAGATGGGCCACCAAGACCGCGTGGT<br/> GGTCAAGCAAGCAACTTCCAACTCATCGGACGCTTCTTGGGACGTTCAAATGCAAGTCAAGGACTTGGTGGCCGAGCGCTGGATCTCCGCTGTGAAGCTCAACGGCC<br/> CGGCACCGTGTCCGCTACGTGGTCAATGACCCTGGCTGGGCGAGCCCGCGCAGCAGTTCGCGCTGTCGGTGTTCAGTGGCCCGTGGTGGTGTATCACGACGACAGGA<br/> CGAATCGCTGTTGGGGCATGGCGACTGCGCCGATCCGACCGCTGATCCGGCGAGCAGCAACTACCGACCGCCCGGCGAGGAGCCGCGACCGCCAGCCGCGGATTCGCGG<br/> CATGGAACCGACTGCCACGCTTGACCGAAACGAGGAATGGGAACGGCCGGGCAACGCGCTGCCATGCCGATGAGCGCTGTTTCTGGACGATGGCGAGCCGTTGGA<br/> GCCCGCACACGGGTACGCTGCCCGCCGGTAG</p>                                                                                                                                                                                                                                                                                                                                                                                                                                                                                                                                                                                                                                                                                                                                                                                                                                                                                                                                                                                                                                                                                                                                                                                                                                                                                                                                                                                                                                                                                                                                                                                                                                                                                                                                                                                                                                                                                                                                                                                                                                                                                                                                                                                                                                                                                                                                                                                                                                                                                                                                                                                                                                                                                                                                                                                                                                                                                                                                                                                                                                                                                                                                                                                                                                                                                                         | <p>Includes coding sequence of required replication protein</p>                          |
| <p>RSF1010 plasmid backbone</p>    | <p>GCTCGACCAGGCTACGCTTATGGTGCCTTTCCGACGTTGGAACGGATGGAGAAGAGGACACCGATCTAGCTATCGCGCCGCGATCAAGCAGGTGCGACAGACTC<br/> ATACTAGATATCAAGCGACTTCTCTATCCCTGGGAACACATCAATCTACCGGAGAAATCGCTGGCAAGCCCTTAGCGTAGGATCCGCCCCCTCCCGCAACAGCCCA<br/> AACAGGAAACGACGCTGAAACGGGAAGCTCAACACCCACTGACGCATGGTGTGTTAGCGCAGTACTTCAACACGCAAGGCGGCACTTTCGCCATCCGCGCCGCCCCACAG<br/> CTCGGGCAGAAACCGCGACCTTACAGCTGAAAGCGACAGGCTGCTCGCGTGGCAAGACTTCGACGGAACCCGTAAGAAAGCCATGCTCCAGCCCGCCGATTTGGAGAAATCT<br/> TCAAAATCCCGTTCACATAGCCCGCAATTCCTTCCCTGCTCTGCCATAAGCGCAGCGAATGGCCGGTAATACTCGTCAACGATCTGATAGAGAGGGTTTGTCCGGTTCGG<br/> TGGCTCTGGTAACGACCATATCCGATCCCGGCTGGCGCTCTGGCCGCCACATGAGCGATGTTCCGCGTCTTCAATACTGTGTTACATACAGTCTATCGCTTAGCGGAA<br/> AGTTCCTTTACCTCAGCCGAAATGCTGCGCTGCTAGACATGCGCAGCAGTGGCCGTCACTCCGCTACTAATGTCAAGAAACCCGCAATAACTGTACAGCCCGCTGCA<br/> ATAACTGTCAGAAACCCGCAATAACTGTACCGCCCAAACTGCAAAACCGAGAGGGGGGGTGGGGGGTGGGAAATCCATCCATGATTTCTAAGAAATACT<br/> CACTAGGCGCGTTATCAGCGCCCTTGTGGGGCTGCTGCTTCCCAATATGCCGCGCAGAGCCCGGATAGCTGCTTATTCGCTCGCTAGGCTACACACCGCCCAAC<br/> GCTGCGCGCAGGGGAAAGGGGGCAAGCCCGCTAAACCCCAACCAACCCCGCAGAAATACGCTGGAGCGCTTTTAGCCGCTTTAGCGGCTTTCCCTTACCCGAAAGG<br/> TGGGGCGCGTGTGACGCCCCGAGGGCTGCTCGGTGATCATTGACCCCGCTCATCTCTGGCGTGGCGGACAGCCGAAAGCGCGCTGCTGGTTCGGCTTCAAGGTA<br/> CGCATCCATTGCCGCTAGAGCGATCCTCCGCGCACTCGTGTGTTCACTTGGCCAAAATCATGGCCCCCAACGACCTTGGCCCTTGTTCGTTCTTCGCTTTCGCTG<br/> CTGTTCCTTGGCCGACCCGCTGAATTCGGCATTGATTCGCGCTCGTGTCTTCCGAGCTGGCCAGCCGATCCGCGCCCTTGTTCGCTCCCTTAAACATCTTGACACCCCA<br/> TTGTTAATGTCTGCTCGTAGGCTATCATGGAGCAGCGCGCGCAATCCGACCCACTTTGAGGGGAGGGCGCACTTACCGGTTCTCTCGAGAACTGGCTAACGG<br/> CCACCTTCGGCGGTGCGCTCTCCGAGGGCAATGCAATGGAGCCGAAAGCAAAAGCAACGAGGCGGATGGCGATTATCACTTACGGCAAAACCGGCGAGAGGCTG<br/> GGCGGCAATCGCCAGGGCAAGCCGACTACATCCAGCGCAAGGCAATATCCCGCCGACATGGATGAATCTTCAAGCCGCAATCCGCGCAATGCCGAGTTCGCTGAG<br/> CGGCGCCGACTACTGGATGCTGCCGACTGATGAACCGGCAATGGCGGCTGTTCAAGGAGTTCGAATTTGCCCTGGCGTGGAGCTGACCCCTGCACGAGCAGAGGGG<br/> CTGGCGTCCGAGTTCCGCCAGCACTGACCGGTGGCGAGCGCTGCCGATACGCTGGCCATCCATGCCGTTGGCGGAGAAACCCGCACTGCCAATGATGATCTCCGAGCGG<br/> ATCAATGACGGCATCGAGCGGCCCCGCTCAGTGGTTCAAGCGGTACAACGCGAAGCCCGGAGAGGGCGGGGACAGAAAGCCGAAAGCGCTCAAGCCCAAGGCATGGCTT<br/> GAGCAGACCCCGGAGGATGGGCGCAATGCCAACCGGGCAATAGAGCGGGTGGCCAGCAGCCCGCATTGACCACAGAACTTGAAGCGCAGGGCATCGAGCGCTGCC<br/> GGTGTTCACCTGGGCGCAAGCTGGTGGAGATGGAAGCCCGGGGATCCGACCCAGCCGCGCAGAGCTGGCCGTAACGATCGACACCGCCAAAGCCGAGATCGACTACAG<br/> GAATCCGGGAGCAATAGCCATGAACGCAATCGACAGAGTGAAGAAATCCAGAGGATCAACGAGTGGAGGAGCAGATCGAAACCGCTGGCCAGAGCATGGCGACTGGC<br/> CGACGAAAGCCCGCAGTCTAGAGCAGCAGCAGCGCCAGCGAGCGCAGCGCGGATGGCTGAAGCCGAGCCGACAGAGGGCGGCAATGGTGGAGCTGGCCAAAGA<br/> GTTGCGGGAGTAGCCCGAGGTGAGCAGCGCCGCGAGCGCCCGGAGCGCGTCCGGGGTGGCACTGGAAGCTATGGTAAACCGTATGCTGGCTTCCATGATGCCTAC<br/> GGTGGTGTGCTGATCGCATGTTGCTTGTCTGACCTGACGCCACTGACAACCGAGGACGGCTGATCTGGCTGCGCTTGGTGGCCGATGAAGAACGACAGGACTTTGAG<br/> GCCATAGCCGACAGCTCAAGGCCATGGGCTGTGAGCGCTTCAATGCGCGTCAAGGACCCCAACCCGCGCAGATGTAACCGGAAATGGTCAAGCCCGCAAGTGTCCAG<br/> AACACGCCATGGCTCAAGCGGATGAATGCCAGGGCAATGACGTGATATCAGGCCCGCGGAGCAGGAGCGGCAATGGTCTGGTGGACGACTCAGCGAGTTGACCTG<br/> GATGACATGAAAGCCGAGGGCGGGAGCTGCCCTGGTAGTGAAGAACCGCGAAGAACTATCAGGATGGTCAAGTGGCCGAGCCCGCAGCGGCTGAACTCGACTACAG<br/> ATTGCCCGACGCTGGCCAGCGAGTACGACCGCAACCCGCGCAGCGCCGACAGCGCCACTATGGCCGTTGGCGGCTTCAACACCCGCAAGGCAAGCAGCAGCCCGCGC<br/> GGTTATCAGCGTGGCTGCTGCTGCTGAATCCAAGGGCAAGCCGCAACCGCTGGCCCGCGCTGGTGGCAGGCTGGCCAGCAGATCGAGCGCCAGCGCGCAGGAG<br/> AAGGCCCGAGGCTGGCCAGCTGAACTGCCGAGCGGCACTTAGCCGCGCCGCGCAGCGGCTGGACGAGTACCAGCGAGATGGCCGGGCTGGTCAAGCGCTTCCGCT<br/> GATGACCTCAGCAAGTGGACTTTATCCGCGCGAGAAGCTGGCCAGCCGGGGCGCAGTGGCGGAAATCGGCAAGGCAATGGCCGAGGCGAGCCCGAGCCGCTGGCAGAGCGC<br/> AAGCCCGCCACGAGCGGATACATCGAGCCACCGTCAAGAGTCAATGGTCTGCGCCAGCGTCCAGCTTGGCGGGCGAGCTGGCAGGGCAGCCCGCCAGCCCGCGCA<br/> GGCATGGACAGGGGGGGGAGATTTCAGCATGATGCTTGGCTGGTACTCACGCTGTTAATCTATGATGACTCACGACAGAAAGGGGTTTATGGAATACGAAAAAGC<br/> GCTTCAGGGTCCGCTACCTGATCAAAGTGAAGGGCTATTGGTTGCCCGTGGCTTGGTTATACGTAACAAAGCCGAGGCTGGCGGCTTTTACGTCGCTGATGGCC<br/> AGCCTTAACCTTGAAGGCTGACCTTGTCTTGTTCGCGAAGCAAGCTTTCCGCGCGGCAAGTTCGCGTGGTACTGATGAAAGCAACAAAGGACAGCAGCAGCCGCA<br/> CCTGCTGGCCAGCCCTGACGCTGACGCCAAGCCGATATGCCGAGCGCATGAAGGCCAAAGGGATGCTGACCGCAAGTTCGCTGACCGCAGCAGATACGAGCGGCTGCG<br/> CGAGTGCCTGGAAGAACTAGAGCGGGCAGGGCGGGGTAGTGACCCCGCAGCGCTAACCAACTGCTGCAAGGAGGCAATCAATGGTACCCATAAGCTATCAAT<br/> ATTCGGAGCGCTTCCGAGCAGCGCCGCAACCGCTGGACTACGTTTTGGCCAACTGTTGGCCGCTACGGTGGGGCGCTGGTGTCCCGCGTGGTCCGGTAAATCCATGCTG<br/> GCCCTGCAACTGGCGCACAGATTGACAGCGGGCGGATCTGCTGGAGTGGCGAACTGCCACCGCCCGGATGATCTACCTGCCCGCGAAGACCCCGCCACCGCCATTCAT<br/> CACCCTGACCGCTTGGGCGCACTCAGCGCCGAGGAACGGCAAGCCGTTGGCTGGCTGACGGCTGATCCAGCGCTGATCGGAGCCTGGCCAACTATGCGCCGGAG<br/> TGGTTCAGCGGCTCAAGCGCGCCGAGGGCGCGCTGATGGTGTGGACGCTGGCGGCTCCACATCGAGGAAAGAAACCGCAGCGCCCATGGCCAGGTCATC</p> | <p>Includes genes for mobilization proteins A, B, C and replication proteins A, B, C</p> |

|     |                                                                                                                                                                                                                                                                                                                                                                                                                                                                                                                                                                                                                                                                                                                                                                                                                                                                                                                                                                                                                                                                                                                                                                                                                                                                                                                                                                                                                                                                                                                                                                                                                       |  |
|-----|-----------------------------------------------------------------------------------------------------------------------------------------------------------------------------------------------------------------------------------------------------------------------------------------------------------------------------------------------------------------------------------------------------------------------------------------------------------------------------------------------------------------------------------------------------------------------------------------------------------------------------------------------------------------------------------------------------------------------------------------------------------------------------------------------------------------------------------------------------------------------------------------------------------------------------------------------------------------------------------------------------------------------------------------------------------------------------------------------------------------------------------------------------------------------------------------------------------------------------------------------------------------------------------------------------------------------------------------------------------------------------------------------------------------------------------------------------------------------------------------------------------------------------------------------------------------------------------------------------------------------|--|
| RCR | TCCGCCGCCCTAGACCTAGTGTCAATTTATTTCCCGCGTTTTCAGCATCAAGAACCTTTGCATAACTTGTCTATATCCACACTGATAATTGCCCTCAAACCAATCTAAAGGC<br>GCTAGAGTTTGTGAAACAATATCTTTTACATCATTCGTATTTAAATTTCCAAACTCCCGCTCCCTTAAGGCGAATAAAAGCCATTAAATCTTTGTATTTACCAATATATAGTC<br>ATCCACTATATCTAAGAGTAAATTTCTCAATTCCTCTTTTGGCTTTCATCAAGTGTATATAGCGGTCATATCAAAATCATTAAGTTCAAAATATCTTTTTGTCTATAT<br>ATGTTTATCTTAGCAATAGCGCTCTTTGATTCATGAGTCAAAATATCATATGAACTTTGATATAATCAAGTATCTCAACATGAGCAACTGAACTATTTCCCAATTTTCGCTT<br>AATCTTGTTCCTAACGCTTTCTATTGTTACAGGATTTTCGTGCAATATATAAAGCTGATAGTGTGTTTTTATAGTCTTTCCATTTCGTATAACATCACTACTATTTCCATGT<br>ATCTTTATCTTTTTTTTCGTCCATATCGTGTAAAGGACTGACAGCCATAGATACGCCCAAACCTCTCAATTTTTCTTCCAATCATTAGGAATTGAGTCAGGATATAATAAAAA<br>TCCAAAATTTCTAGCTTTAGTATTTTAAATAGCCATGATATAATACCTTATCAAAAACAAGTAGCGAAAACCTCGTATCTCTAAAAACCGGAGCTTTTCGCTTATTTTTTTG<br>TTCGATTCCTTTCTGCAATCTTCTATAGCTAACGCCGCAACCGCAGATTTTGAAAAACCTTTTGGTTTCGCCATATCTGTTAATTTTTATCTTGTCTTTTGTGAGAGA<br>AATCATAACTCTTTTTTCGATCTGAAATCACCATTTAAAAAACTCCAATCAAAATAATTTATAAAGTGTGTATCACTTTGTAATCATAAAAACAACAATAAGCTACTTA<br>AATATAGATTTATAAAAAACGTTGGCGAAAACGTTGGCGATTCGTTGGCGATTGAAAAACCCCTTAACCCCTTGAGCCAGTTGGGATAGAGCGTTTTTGGCACAAAAATTTGGCA<br>CTCGGCCTTAATGGGGGCTGTAGTACGGAAGCAAAATTCGCTTCTTTCCCGCATTTTTTCCAAATTCCAAATTTTTTCAAAAAATTTCCAGCGCTACCGCTCGGCAAA<br>ATTGCAAGCAATTTTAAATCAAAACCATGAGGGAATTCATTTCCCTCATACTCCCTTGAGGCTCCTCCAACCGAAATAGAAGGGCGCTGGCTTATTTATTCATTTCAGTCAT<br>CGGCTTTCATAATCTAACAGACAACATCTTCGCTGCAAGCCACGCTACGCTCAAGGGCTTTTACGCTACGATAACGCCTGTTTTAACGATTATGCCGATAACTAAACGAAATA<br>AACGCTAAAACGCTCTCAGAAACGATTTGAGACGTTTTAATAAAAAATCGCCTAGTGC |  |
|-----|-----------------------------------------------------------------------------------------------------------------------------------------------------------------------------------------------------------------------------------------------------------------------------------------------------------------------------------------------------------------------------------------------------------------------------------------------------------------------------------------------------------------------------------------------------------------------------------------------------------------------------------------------------------------------------------------------------------------------------------------------------------------------------------------------------------------------------------------------------------------------------------------------------------------------------------------------------------------------------------------------------------------------------------------------------------------------------------------------------------------------------------------------------------------------------------------------------------------------------------------------------------------------------------------------------------------------------------------------------------------------------------------------------------------------------------------------------------------------------------------------------------------------------------------------------------------------------------------------------------------------|--|

| <u>Transposon inverted repeat sequences</u> | Sequence                   | Notes |
|---------------------------------------------|----------------------------|-------|
| Himar                                       | ACAGGTTGGATGATAAGTCCCGGTCT |       |
| Tn5                                         | CTGTCTCTTATACACATCT        |       |

| <u>Regulatory sequences (5' UTRs, incl. promoter and RBS)</u> | Sequence                                                                                                                                                             | Notes                                     |
|---------------------------------------------------------------|----------------------------------------------------------------------------------------------------------------------------------------------------------------------|-------------------------------------------|
| 1                                                             | GATTGCATTAGGTTTTAGTTCCTTGTATAATGCTTAATGTTGGTCACTGACAGGCTACGATACGGAAGGTTGCTCACGCCCGGCCCTTTGCCATGGCTAGTGTGTGAAATTT<br>CCGAGGAGCAAGTCTATTTCCAAAATGGCGAAAAGGAGGTAATACA   | From <i>Bacillus cellulosilyticus</i>     |
| 2                                                             | GGGAGAGCTTCAACGGCGCTTCTACCCATTTGCTTGGAAAGGATGAGGAGCAGGAAGAAATTCGTCGCCAATGCGACGGCCCTTTACATCCATGTTGTTGATAGTATAATGG<br>ATACGGATTGACCAAATTTTCATTTAGTCAGTTTGAAGGATGAGGAGT | From <i>Geobacillus sp.</i>               |
| 3                                                             | GTGAAGGATACGGCTGCGGCACCTCGACATCGCCCATGTGGCGGCTTTGAACGTGGCTTATGAAACGCGTTCAACCTTTTTGACCATCGGCGCAAGCTGGTATCATGCG<br>TTCAGCTTTTGGCCATACATACTACGTGCTCAATCTAGGAGGATTTTCATC | From <i>Eggerthella lenta</i>             |
| 4                                                             | CTCTAGAGTAGTAGATTATTTAGGAATTTAGATGTTTTGTATGAAATAGATGCTTCGTATGGAATTAATGAAATTTTTAGTCAGGTAAAAAGGTAATAGGAGATATT                                                          | From Segmented Filamentous Bacteria (SFB) |
| 5                                                             | GTTTTAAATGATGAAAGAAATATTAGGGAAGATTGTTTCGACGCGAATGTTGATCTGGAATATGATCACCTTATCGGACAAGCTTTAAATAGGAGGATATAAAAAAT                                                          | From Segmented Filamentous Bacteria (SFB) |
| 6                                                             | ATAAGGATTCCTTAAAGAGAGATATAGTTATGTCAAGACTGTAGAATTTTTAGTAAATCAAAATAAAAAAGGATTAATAAGAGTGTATTTAAAGGAGGAGACTT                                                             | From Segmented Filamentous Bacteria (SFB) |
| 7                                                             | AAACACCAATAAAATTAGAATATTTAGGAGGACTTTAAAAAGTTTAAATAAGAATTTTATGAGATATTTTTATTATATTTAAACTCAATTTAAAGTAGGAGAATAG                                                           | From Segmented Filamentous Bacteria (SFB) |
| 8                                                             | GCAAGTGTCAAGAAGTTATTAAGTCGGAGTGCAGTCAAGTGGCGAAGTTGAAAAATTCACAAAATGTGTATAATATCTTTGTTTCATTAGAGCGATAAACTTGAATTTGA<br>GAGGGAACCTTAG                                      | From <i>Clostridium perfringens</i>       |

**Primers for PCR validation of transconjugants**

16S forward AGAGTTTATCATGGCTCAG

16S reverse CGGTTACCTTGTACGACTT

GFP validation primer forward ATGCGTAAAGCGGAAGAGC

GFP validation primer reverse TTATTTGTACAGTTTCATCCATACCATG

Beta-lactamase validation primer forward ATGAGTATTCACATTTCCGTGTC

Beta-lactamase validation primer reverse TTACCAATGCTTAATCAGTGAGGC



|                                                   |                              |
|---------------------------------------------------|------------------------------|
| pGT-B backbone validation primer forward          | CTGCGCAACCCAAGTGCTAC         |
| pGT-B backbone validation primer reverse          | CAGTCCAGAGAAATCGGCATTCA      |
| pGT-Ah backbone validation primer forward         | ATGGAAAAAAGGAATTCGTGTTTTG    |
| pGT-Ah backbone validation primer reverse         | TTATTCAACATAGTCCCTTCAAGAGC   |
| CarbR internal forward primer                     | CCGAAGAACGTTTTCCAATGATGAG    |
| GFP internal reverse primer                       | TGATTGTCTGGCAGCAGAAC         |
| catP (chlor resistance) validation primer forward | GCAAGTGTTCAGAAGTTATTAAGTC    |
| catP (chlor resistance) validation primer reverse | TTAACTATTTATCAATTCCTGCAATTCG |
| tetQ (tet resistance) internal forward primer     | TGGAAGAACGATTTCCGTAAGGT      |

**Supplementary Table 4. List of isolated transconjugant strains**

Strains are grouped by the mouse cohort they were isolated from and the vector library used in the study. All family-level assignments were made using the RDP classifier with confidence >0.89.

| Taconic mice <i>in situ</i> conjugations |                                         |                                           |                                   |                 |                       |
|------------------------------------------|-----------------------------------------|-------------------------------------------|-----------------------------------|-----------------|-----------------------|
| Vector library                           | Family                                  | Genus                                     | Genus-level assignment confidence | Vector received | Antibiotic resistance |
| pGT-L6                                   | Erysipelotrichaceae (Clostridium XVIII) | <i>Erysipelotrichaceae incertae sedis</i> | 1                                 | pGT-Ah          | carb                  |
|                                          | Bacteroidaceae                          | <i>Bacteroides</i>                        | 1                                 | pGT-Ah          | carb                  |
|                                          | Enterobacteriaceae                      | <i>Proteus</i>                            | 1                                 | pGT-Ah          | carb                  |
|                                          | Enterobacteriaceae                      | <i>Citrobacter</i>                        | 1                                 | pGT-Ah          | carb                  |
|                                          | Enterococcaceae                         | <i>Enterococcus</i>                       | 1                                 | pGT-Ah          | carb                  |
|                                          | Lachnospiraceae                         | <i>Hungatella</i>                         | 0.72                              | pGT-Ah          | carb                  |
|                                          | Lachnospiraceae                         | <i>Clostridium XIVa</i>                   | 1                                 | pGT-Ah          | carb                  |
|                                          | Lachnospiraceae                         | <i>Anaerostipes</i>                       | 1                                 | pGT-Ah          | carb                  |
|                                          | Lachnospiraceae                         | <i>Moryella</i>                           | 0.19                              | pGT-Ah          | carb                  |
|                                          | Lachnospiraceae                         | <i>Blautia</i>                            | 1                                 | pGT-Ah          | carb                  |
|                                          | Lactobacillaceae                        | <i>Lactobacillus</i>                      | 1                                 | pGT-Ah          | carb                  |
|                                          | Peptostreptococcaceae                   | <i>Clostridium XI</i>                     | 1                                 | pGT-Ah          | carb                  |
| pGT-L3                                   | Coriobacteriaceae                       | <i>Eggerthella</i>                        | 1                                 | pGT-S           | tet                   |
|                                          | Enterobacteriaceae                      | <i>Cosenzaea</i>                          | 0.73                              | pGT-S           | tet                   |
|                                          | Enterobacteriaceae                      | <i>Proteus</i>                            | 1                                 | pGT-S           | tet                   |
|                                          | Enterococcaceae                         | <i>Enterococcus</i>                       | 1                                 | pGT-S           | carb                  |
|                                          | Lachnospiraceae                         | <i>Lactonifactor</i>                      | 0.7                               | pGT-S           | tet                   |
|                                          | Lachnospiraceae                         | <i>Clostridium XIVa</i>                   | 1                                 | pGT-S           | carb                  |
|                                          | Lachnospiraceae                         | <i>Hungatella</i>                         | 0.71                              | pGT-S           | tet                   |
|                                          | Lachnospiraceae                         | <i>Clostridium XIVa</i>                   | 1                                 | pGT-S           | tet                   |
|                                          | Lachnospiraceae                         | <i>Blautia</i>                            | 1                                 | pGT-S           | tet                   |
|                                          | Lachnospiraceae                         | <i>Robinsoniella</i>                      | 0.42                              | pGT-S           | tet                   |
|                                          | Lachnospiraceae                         | <i>Eisenbergiella</i>                     | 0.99                              | pGT-S           | tet                   |
|                                          | Lactobacillaceae                        | <i>Lactobacillus</i>                      | 0.89                              | pGT-S           | tet                   |

| Charles River mice <i>in situ</i> conjugations |                    |                        |                                   |                 |                       |
|------------------------------------------------|--------------------|------------------------|-----------------------------------|-----------------|-----------------------|
| Vector library                                 | Family             | Genus                  | Genus-level assignment confidence | Vector received | Antibiotic resistance |
| pGT-L6                                         | Bacteroidaceae     | <i>Bacteroides</i>     | 1                                 | pGT-Ah          | carb                  |
|                                                | Enterococcaceae    | <i>Enterococcus</i>    | 1                                 | pGT-Ah          | carb                  |
|                                                | Lactobacillaceae   | <i>Lactobacillus</i>   | 1                                 | pGT-Ah          | carb                  |
|                                                | Porphyromonadaceae | <i>Parabacteroides</i> | 1                                 | pGT-Ah          | carb                  |

| <i>In vitro</i> conjugations |                    |                      |                                   |                 |                       |
|------------------------------|--------------------|----------------------|-----------------------------------|-----------------|-----------------------|
| Vector library               | Family             | Genus                | Genus-level assignment confidence | Vector received | Antibiotic resistance |
| pGT-L7                       | Enterobacteriaceae | <i>Proteus</i>       | 1                                 | pGT-Ah          | carb                  |
|                              | Enterococcaceae    | <i>Enterococcus</i>  | 1                                 | pGT-Ah          | carb                  |
|                              | Enterobacteriaceae | <i>Escherichia</i>   | 1                                 | pGT-Ah          | carb                  |
|                              | Lactobacillaceae   | <i>Lactobacillus</i> | 1                                 | pGT-Ah          | carb                  |
|                              | Bacillaceae        | <i>Bacillus</i>      | 1                                 | pGT-Ah          | carb                  |
| pGT-L3                       | Enterobacteriaceae | <i>Escherichia</i>   | 1                                 | pGT-S           | carb                  |
|                              | Enterococcaceae    | <i>Enterococcus</i>  | 1                                 | pGT-S           | carb                  |
|                              | Enterobacteriaceae | <i>Proteus</i>       | 1                                 | pGT-S           | carb                  |
| pGT-L5                       | Enterobacteriaceae | <i>Cosenzaea</i>     | 0.89                              | pGT-Ah          | chl                   |
|                              | Enterobacteriaceae | <i>Proteus</i>       | 1                                 | pGT-Ah          | chl                   |
|                              | Burkholderiaceae   | <i>Cupriavidus</i>   | 1                                 | pGT-Ah          | chl                   |
| pGT-L4                       | Enterobacteriaceae | <i>Escherichia</i>   | 1                                 | pGT-Ah          | carb                  |
|                              | Enterobacteriaceae | <i>Proteus</i>       | 1                                 | pGT-Ah          | carb                  |
|                              | Enterobacteriaceae | <i>Escherichia</i>   | 1                                 | pGT-B           | carb                  |
